# Supplementary material for: Evaluation of Wet Snow Dielectric Mixing Models for L-Band Radiometric Measurement of Liquid Water Content in Greenland’s Percolation Zone
Source: Copernicus journal article supplement (doi:10.5194/egusphere-2025-2681), 2025-07-03
Supplement: Supplementary file [file egusphere-2025-2681-AC4-supplement.pdf]

Authors' comment:

Dear Editor,

Thank you for your question. Mousavi et al. (2022) modeled the dielectric constants of medium 2 (wet snow) and medium 4 (semi-infinite dry snow) in a four-layer configuration using the formulations of Ulaby and Long (2014, Chapter 4, pp. 140–145, Eq. 4.55 – 4.61). However, they explicitly prescribed the complex dielectric constant of medium 3 (the highly reflective layer) as  $3.5 - 9j$ . For details, please refer to Table II in Mousavi et al. (2022), where the layer properties of the four-layer model are listed (corresponding to the Fig. 3b where the semi-infinite air medium was considered as a separate layer).

While we follow a similar modeling approach, we use different values for the complex dielectric constant of the reflective layer ( $\epsilon_2 = \epsilon_r - 0.0002j$ ), as we consider such high absorption (caused by loss factor  $9j$ ) to be unlikely in dry snow. Instead, we hypothesize that successive reflection caused by complex stratigraphy is the dominant mechanism. Therefore, we tune the real part of  $\epsilon_2$  to match the simulated and observed brightness temperatures at each grid point during the frozen season.

Sincerely,

Alamgir Hossan (on behalf of the authors)
